# Supplementary material for: Microglia activation in periplaque white matter in multiple sclerosis depends on age and lesion type, but does not correlate with oligodendroglial loss
Source: Springer Nature journal article supplement (doi:10.1007/s00401-023-02645-2), 2023-10-28
Supplement: MOESM1 [file 26235052]

# Supplementary Figure 1

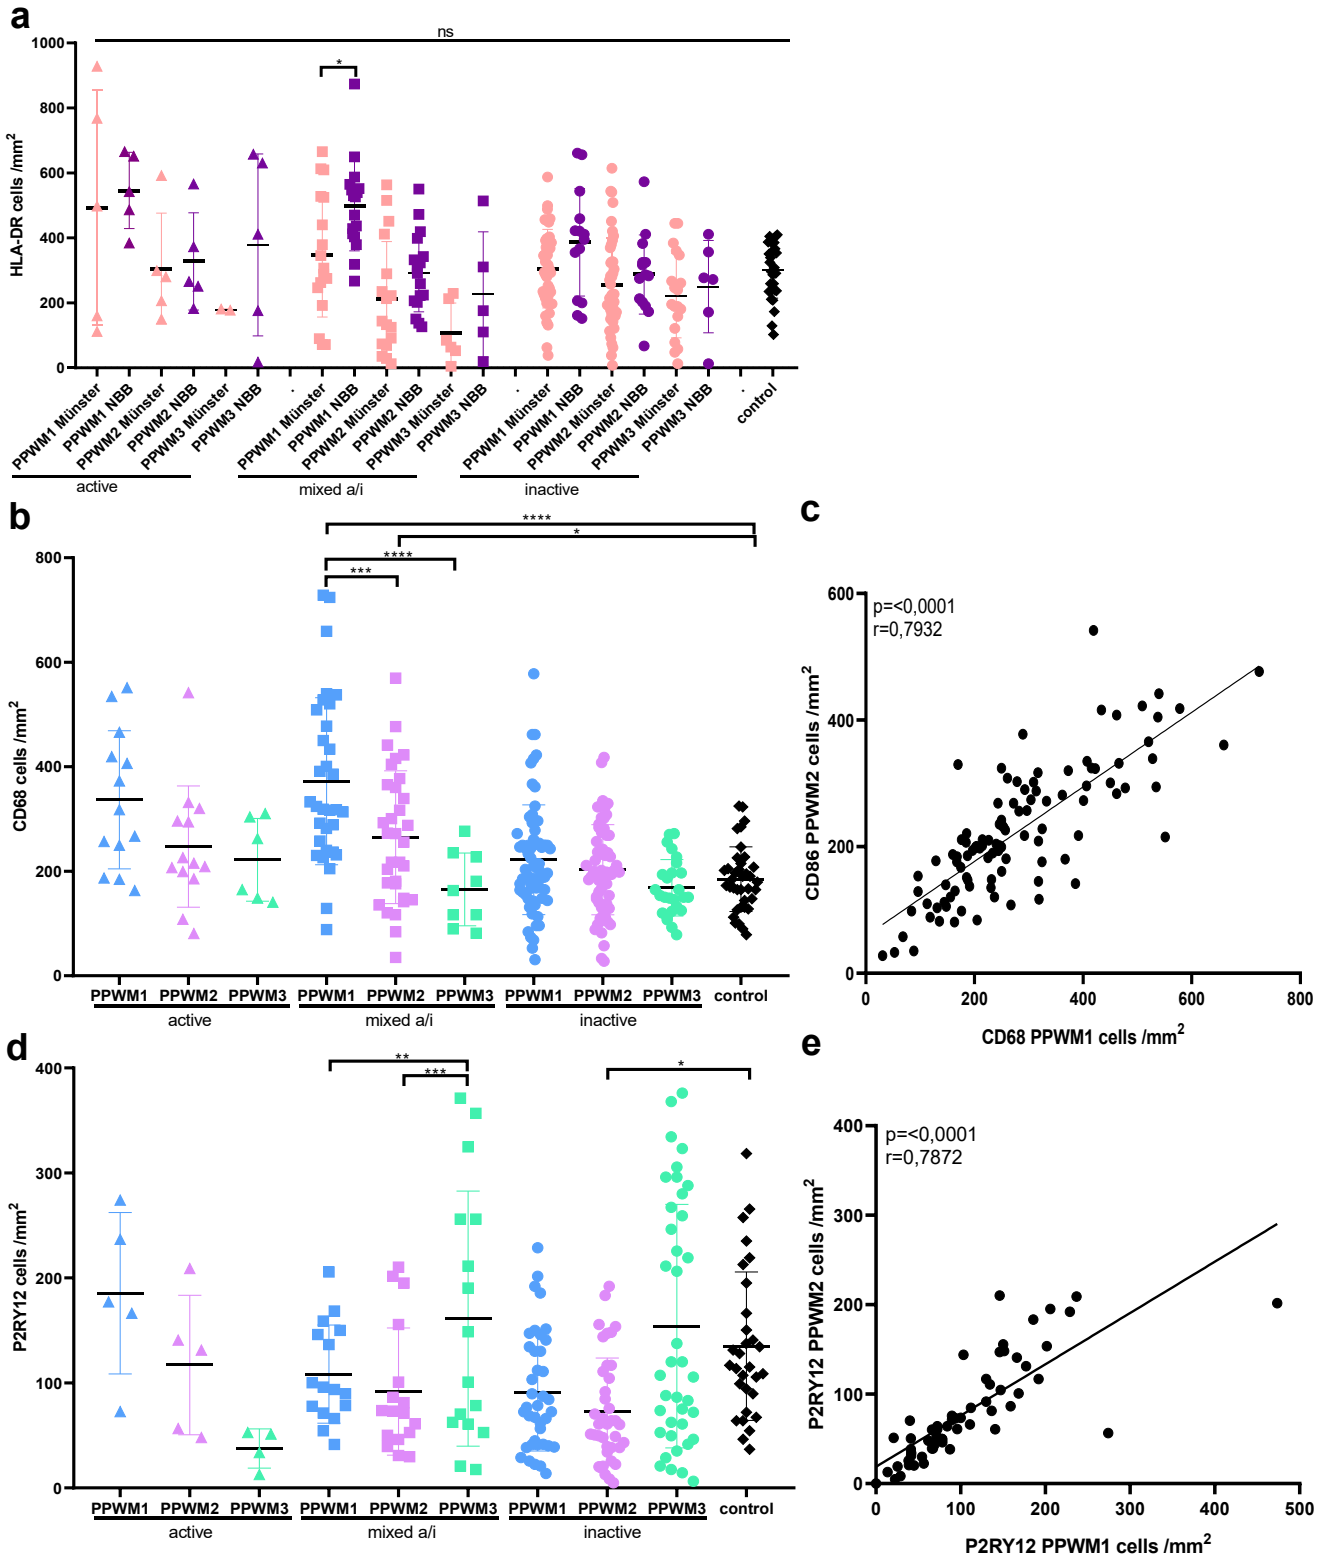

Microglia activation in periplaque white matter in multiple sclerosis depends on age and lesion type, but does not correlate with oligodendroglial loss, *Acta Neuropathologica*, Wiebke Kessler, tanja.kuhlmann@ukmuenster.de

# Supplementary Figure 2

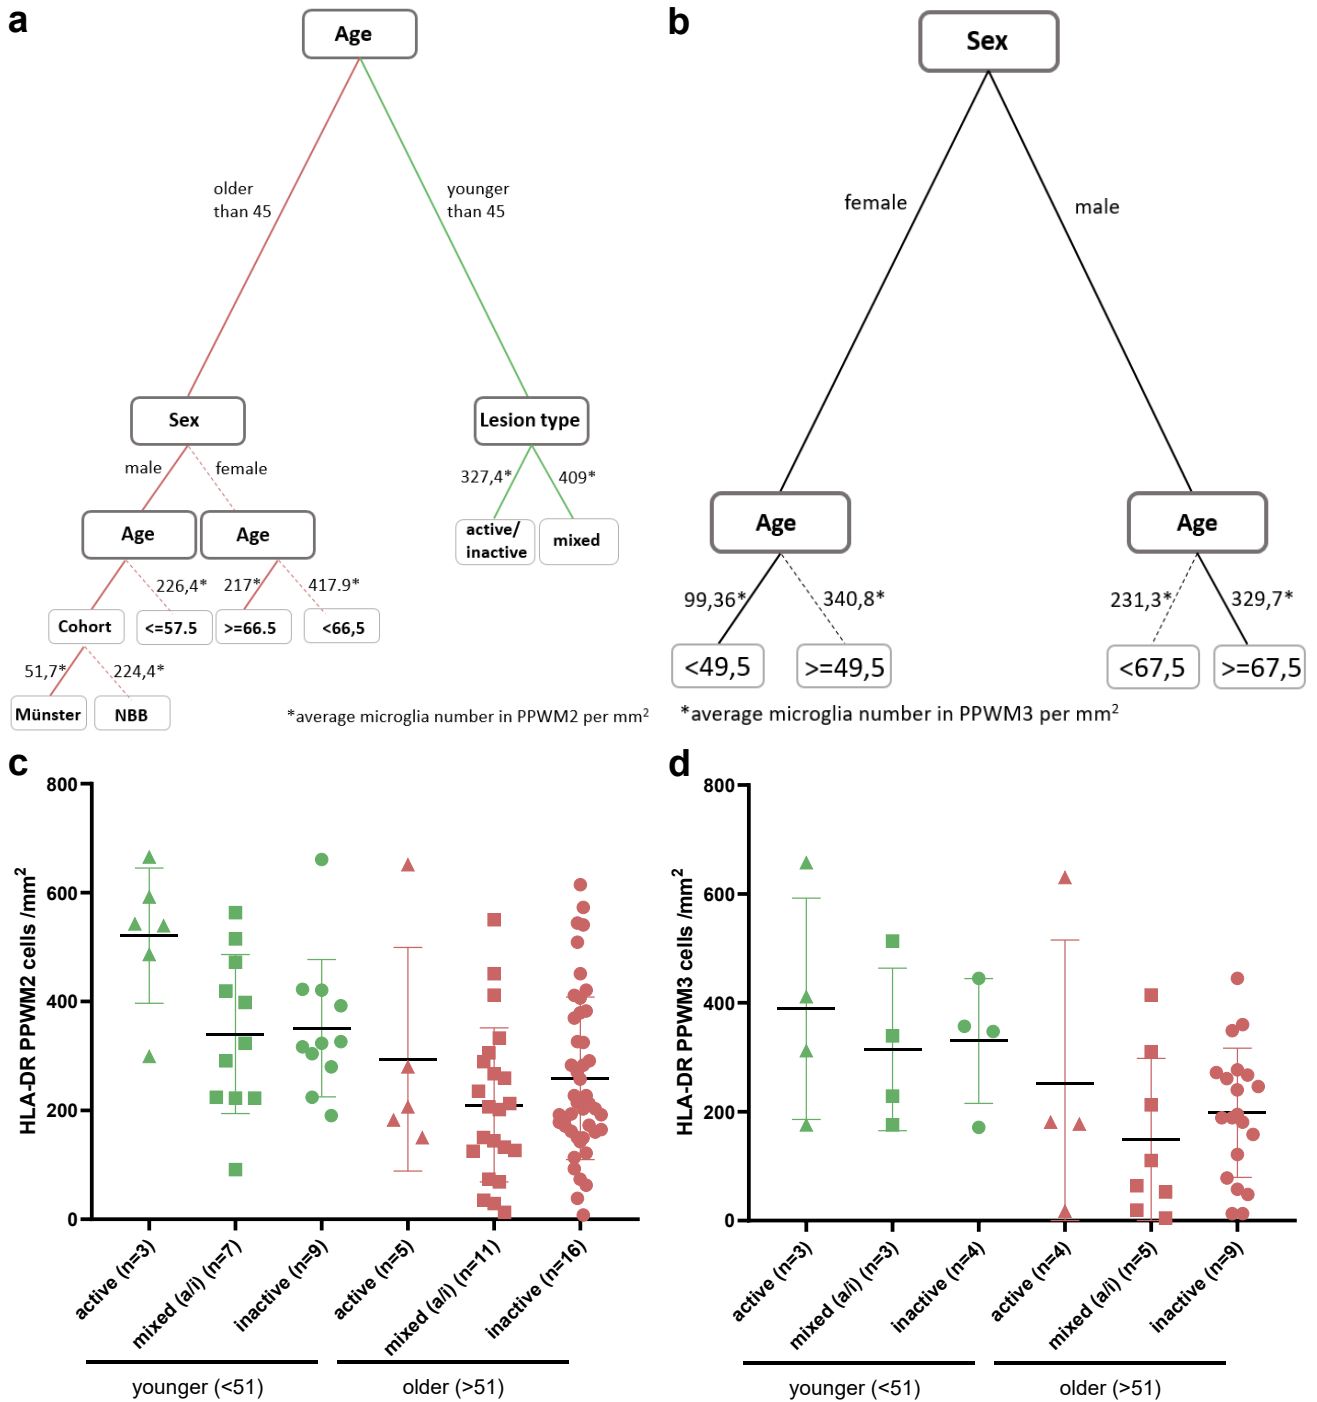

Microglia activation in periplaque white matter in multiple sclerosis depends on age and lesion type, but does not correlate with oligodendroglial loss, *Acta Neuropathologica*, Wiebke Kessler, tanja.kuhlmann@ukmuenster.de
